# Supplementary material
Source: PubMed Central journal article supplement (PMC9041457)
Supplement: Suppl_TableS1.pdf [file Suppl_TableS1.pdf]

## Supplementary Data

SUPPLEMENTARY TABLE S1. BACTERIOPHAGES IN DARK GRAY WERE USED TO FORMULATE PHAGE COCKTAILS, TESTING WITH PHAGES IN MID GRAY WAS ENDED AFTER EFFICIENCY OF PLATING TESTING, AND TESTING WITH PHAGES IN LIGHT GRAY WAS ENDED AFTER HOST RANGE ANALYSIS

| <i>Phage</i> | <i>Library amplification host</i> | <i>Library titer (PFU/mL)</i> |
|--------------|-----------------------------------|-------------------------------|
| SE15         | Saintpaul S5-649                  | ~ 10 <sup>11</sup>            |
| SS9          | Enteritidis S187                  | ~ 10 <sup>10</sup>            |
| SC5          | Saintpaul S5-649                  | ~ 10 <sup>10</sup>            |
| SF1          | Enteritidis S5-483                | ~ 10 <sup>10</sup>            |
| SF2          | Enteritidis S5-483                | ~ 10 <sup>10</sup>            |
| SF4          | Enteritidis S5-483                | ~ 10 <sup>10</sup>            |
| SF11         | Enteritidis S5-483                | ~ 10 <sup>10</sup>            |
| SI1          | Enteritidis S5-483                | ~ 10 <sup>10</sup>            |
| SI23         | Enteritidis S5-483                | ~ 10 <sup>10</sup>            |
| SS1          | Enteritidis S5-483                | ~ 10 <sup>10</sup>            |
| SS4          | Enteritidis S5-483                | ~ 10 <sup>10</sup>            |
| SE12         | Newport S195                      | ~ 10 <sup>9</sup>             |
| SE13         | Newport S195                      | ~ 10 <sup>10</sup>            |
| SE20         | Muenchen S5-504                   | ~ 10 <sup>9</sup>             |
| SE2          | Saintpaul S5-649                  | ~ 10 <sup>9</sup>             |
| SE9          | Saintpaul S5-649                  | ~ 10 <sup>9</sup>             |
| SE18         | Typhimurium S5-536                | ~ 10 <sup>9</sup>             |
| SS3          | Typhimurium S5-536                | ~ 10 <sup>9</sup>             |
| SI4          | Newport S2                        | ~ 10 <sup>8</sup>             |
| SC6          | Montevideo S5-630                 | ~ 10 <sup>8</sup>             |
| SE19         | Muenchen S5-504                   | ~ 10 <sup>9</sup>             |
| SE3          | Saintpaul S5-649                  | ~ 10 <sup>9</sup>             |
| SE24         | Typhimurium S5-536                | ~ 10 <sup>8</sup>             |
| SF6          | Newport S2                        | ~ 10 <sup>8</sup>             |
| SF8          | Newport S2                        | ~ 10 <sup>8</sup>             |
| SF10         | Newport S2                        | ~ 10 <sup>8</sup>             |
| SI3          | Newport S2                        | ~ 10 <sup>8</sup>             |
| SI5          | Newport S2                        | ~ 10 <sup>8</sup>             |
| SI8          | Newport S2                        | ~ 10 <sup>9</sup>             |
| SS11         | Newport S2                        | ~ 10 <sup>9</sup>             |
| SE8          | Thompson S5-523                   | ~ 10 <sup>8</sup>             |
| SE11         | Thompson S5-523                   | ~ 10 <sup>9</sup>             |
| SI9          | Thompson S5-523                   | ~ 10 <sup>9</sup>             |
| SI12         | Thompson S5-523                   | ~ 10 <sup>8</sup>             |
| SI15         | Thompson S5-523                   | ~ 10 <sup>8</sup>             |
| SI20         | Thompson S5-523                   | ~ 10 <sup>8</sup>             |
| SI22         | Thompson S5-523                   | ~ 10 <sup>8</sup>             |
| SI25         | Thompson S5-523                   | ~ 10 <sup>8</sup>             |
| SE4          | Montevideo S5-630                 | ~ 10 <sup>9</sup>             |
| SW14         | Montevideo S5-630                 | ~ 10 <sup>8</sup>             |
| SE14         | Typhimurium S5-536                | ~ 10 <sup>10</sup>            |
| SF5          | Enteritidis S5-483                | ~ 10 <sup>10</sup>            |
| SB5          | Newport S2                        | ~ 10 <sup>8</sup>             |
| SI14         | Newport S2                        | ~ 10 <sup>8</sup>             |

Phages propagated to <10<sup>8</sup> PFU/mL have been excluded here. PFU, plaque forming units.
